# Supplementary material for: Time-resolved β-lactam cleavage by L1 metallo-β-lactamase
Source: Springer Nature journal article supplement (doi:10.1038/s41467-022-35029-3), 2022-11-30
Supplement: MOESM1 [file 41467_2022_35029_MOESM1_ESM.pdf › 41467_2022_35029_MOESM1_ESM.pdf]

## Supplementary Information

### Time-Resolved $\beta$ -lactam Cleavage by L1 Metallo- $\beta$ -Lactamase

Wilamowski, M.<sup>1,2,3</sup>, Sherrell, D.A.<sup>4</sup>, Kim, Y.<sup>1,4</sup>, Lavens, A.<sup>4</sup>, Henning, R.W.<sup>5</sup>, Lazarski, K.<sup>4</sup>, Shigemoto, A.<sup>6</sup>, Endres, M.<sup>1</sup>, Maltseva, N.<sup>1</sup>, Babnigg, G.<sup>1</sup>, Burdette, S.C.<sup>6</sup>, Srajer, V.<sup>5</sup>, Joachimiak, A.<sup>1,2,4\*</sup>

<sup>1</sup>Center for Structural Genomics of Infectious Diseases, Consortium for Advanced Science and Engineering, University of Chicago, Chicago, IL 60667, USA; <sup>2</sup>Department of Biochemistry and Molecular Biology, University of Chicago, Chicago, IL 60637, USA; <sup>3</sup>Department of General Biochemistry, Faculty of Biochemistry, Biophysics and Biotechnology of Jagiellonian University, Krakow, 30387, Poland; <sup>4</sup>Structural Biology Center, X-ray Science Division, Argonne National Laboratory, Argonne, IL 60439, USA, <sup>5</sup>Center for Advanced Radiation Sources, University of Chicago, Chicago, IL 60637, USA. <sup>6</sup>Department of Chemistry and Biochemistry, Worcester Polytechnic Institute, Worcester, MA 01609, USA

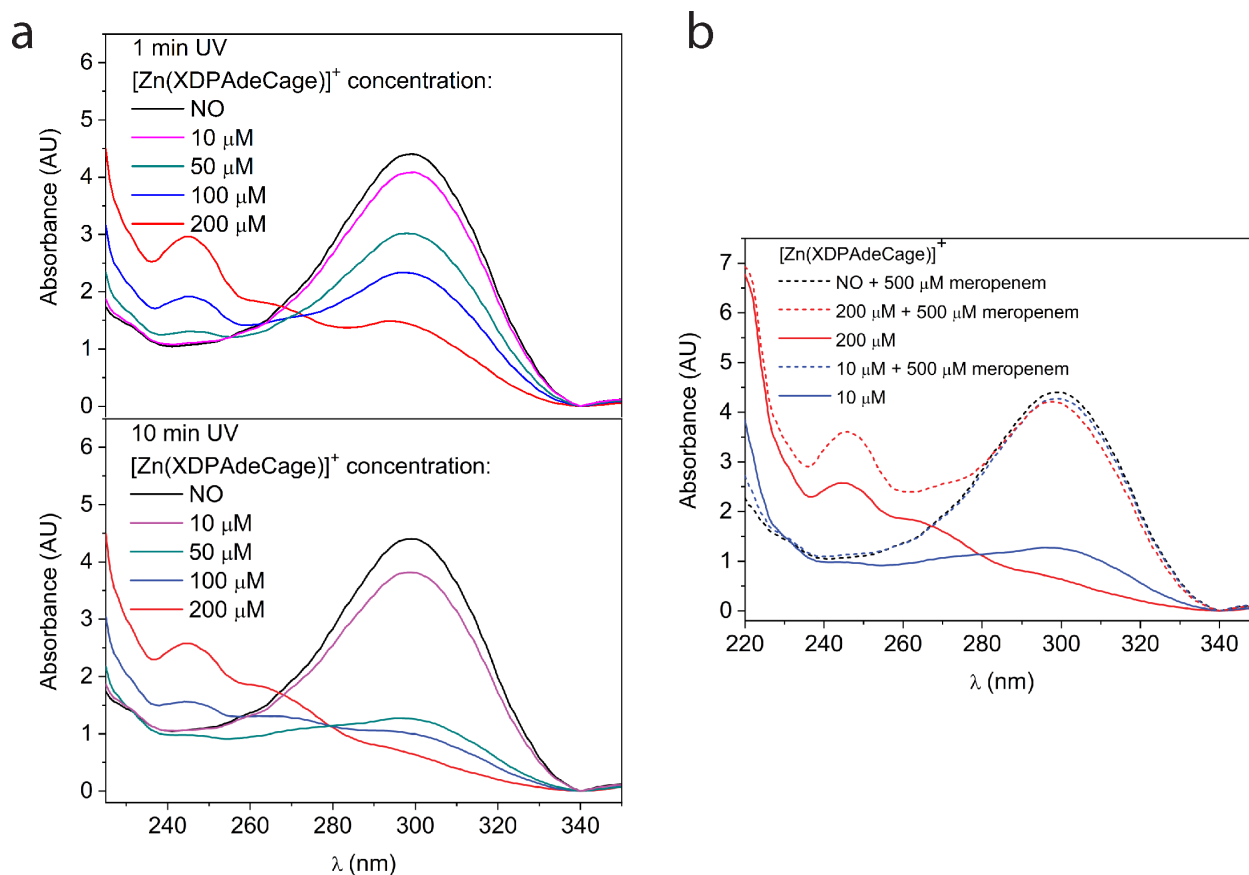

**Supplementary Figure 1.** Photolysis of  $[\text{Zn}(\text{XDPAdCage})]^+$  with 347 nm UV light in solution triggers cleavage of meropenem in a presence of L1 from *S. maltophilia*. **a.** Activity of L1 MBL against meropenem. Prior experiment zinc ions were removed from L1 by dialysis against buffer B containing EDTA. For the measurements we used 500  $\mu$ M of meropenem with 0.1  $\mu$ M of L1 MBL. **b.** Control spectra depicting absorption of meropenem and  $[\text{Zn}(\text{XDPAdCage})]^+$  without L1 MBL.

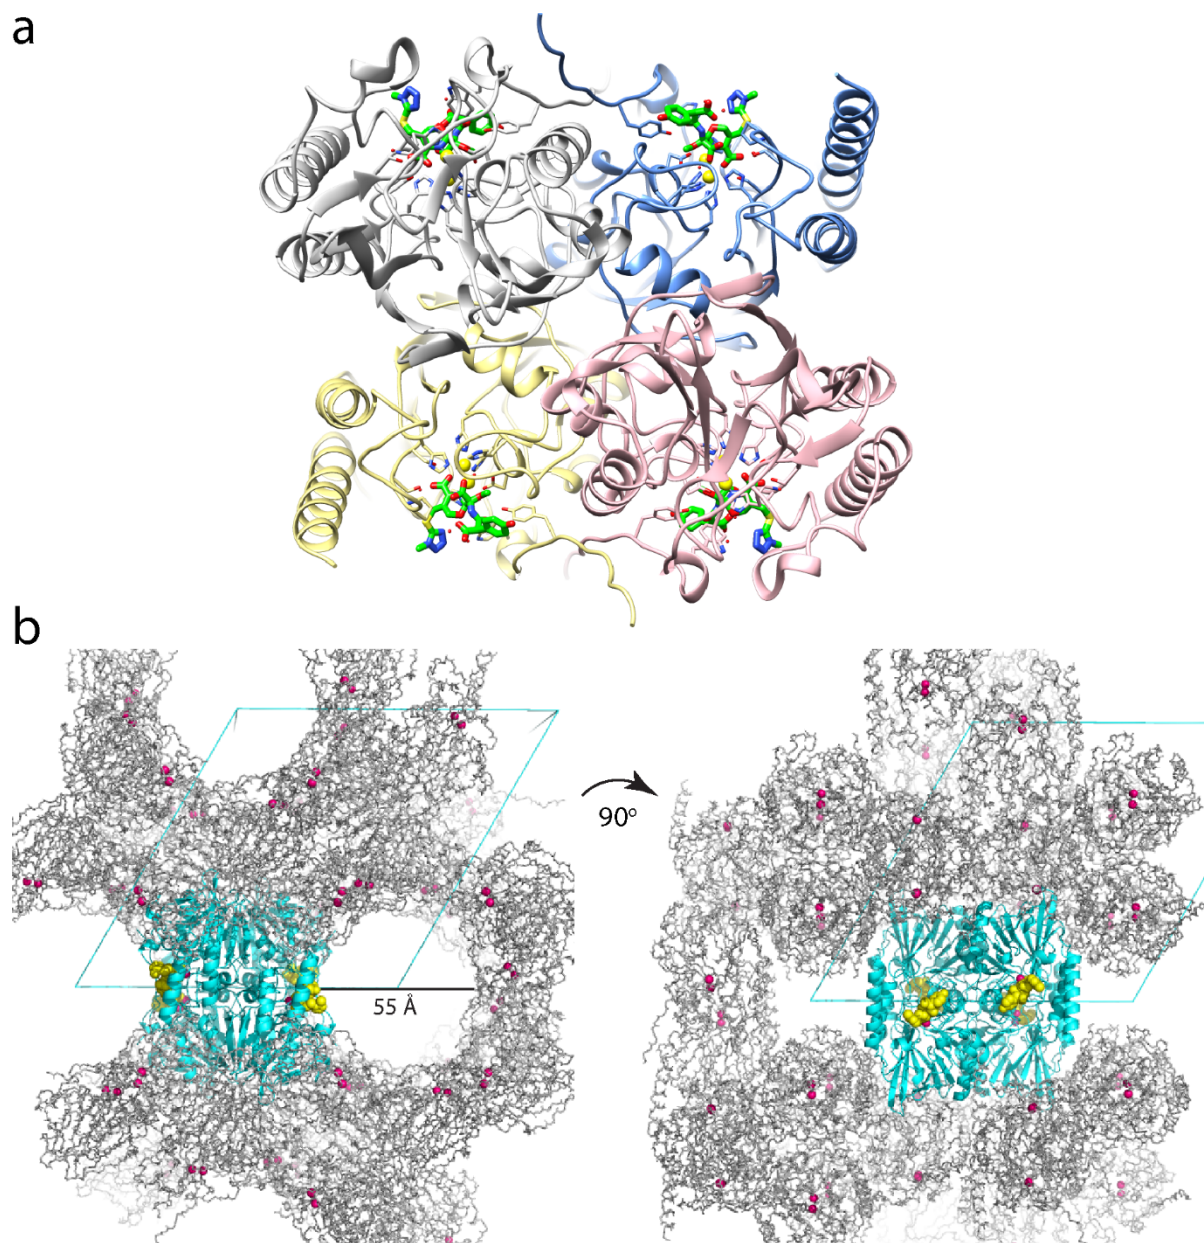

**Supplementary Figure 2.** Structure of L1 tetramer in complex with hydrolyzed moxalactam. **a.** Cartoon representation of L1 MBL tetramer, subunits are generated by applying crystallographic symmetry. **b.** Crystal packing of L1 MBL at P6<sub>4</sub>22 space group. Symmetry mates of L1 crystal structure were depicted as grey sticks, the secondary structures for tetramer biological assembly were shown as cyan, and the moxalactam bound to L1 tetramer was shown as yellow. To illustrate the localization of all active sites in the crystal of L1 MBL the zinc atoms were illustrated as purple spheres.

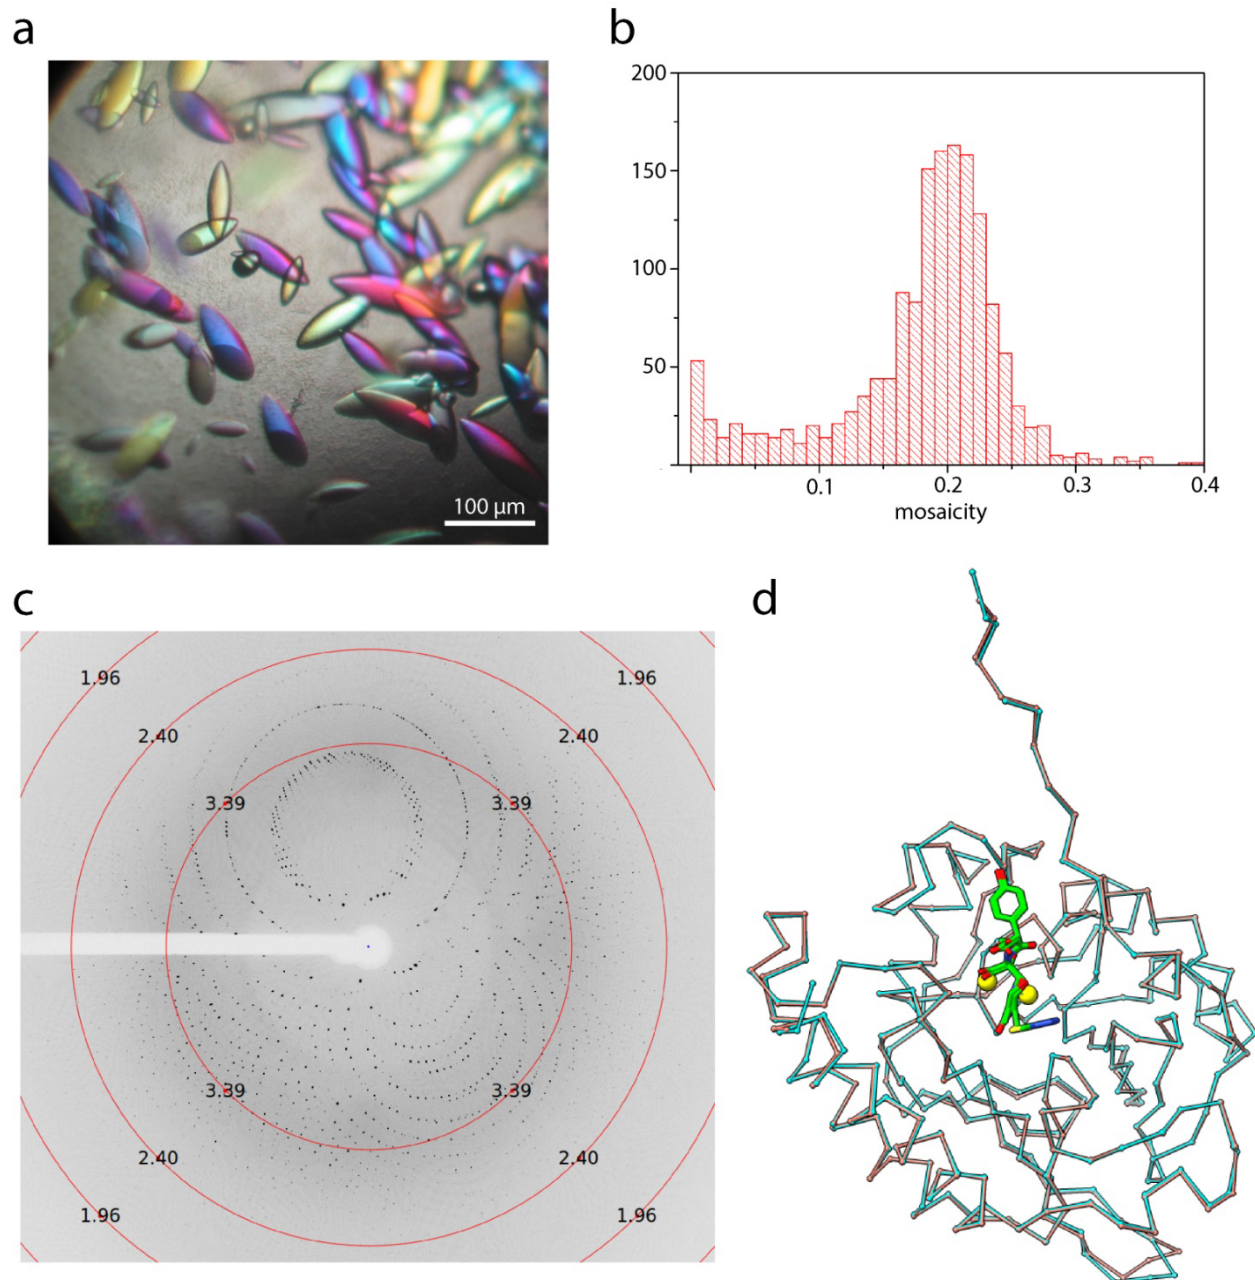

**Supplementary Figure 3.** Crystals of L1 from *S. maltophilia* grown using batch crystallization. **a.** Crystallization conditions were established and repeated for all collected data sets (more than 20 times). Crystal nucleation was initiated by micro-seeding resulting in high homogeneity of grown crystals. **b.** Histogram of mosaicity values from monochromatic diffraction data obtained during data collection at 19-ID beamline at APS as a part of L1 SSX experiments. **c.** Diffraction image obtained from L1 crystal deposited on nylon mesh using “pink” beam during TR-SSX experiment at 14-ID-B BioCARS beamline at APS. **d.** Superposition of L1 MBL structure from “pink” beam SSX (PDB entry 7L91) and cryo-cooled crystal (PDB entry 6UAC).



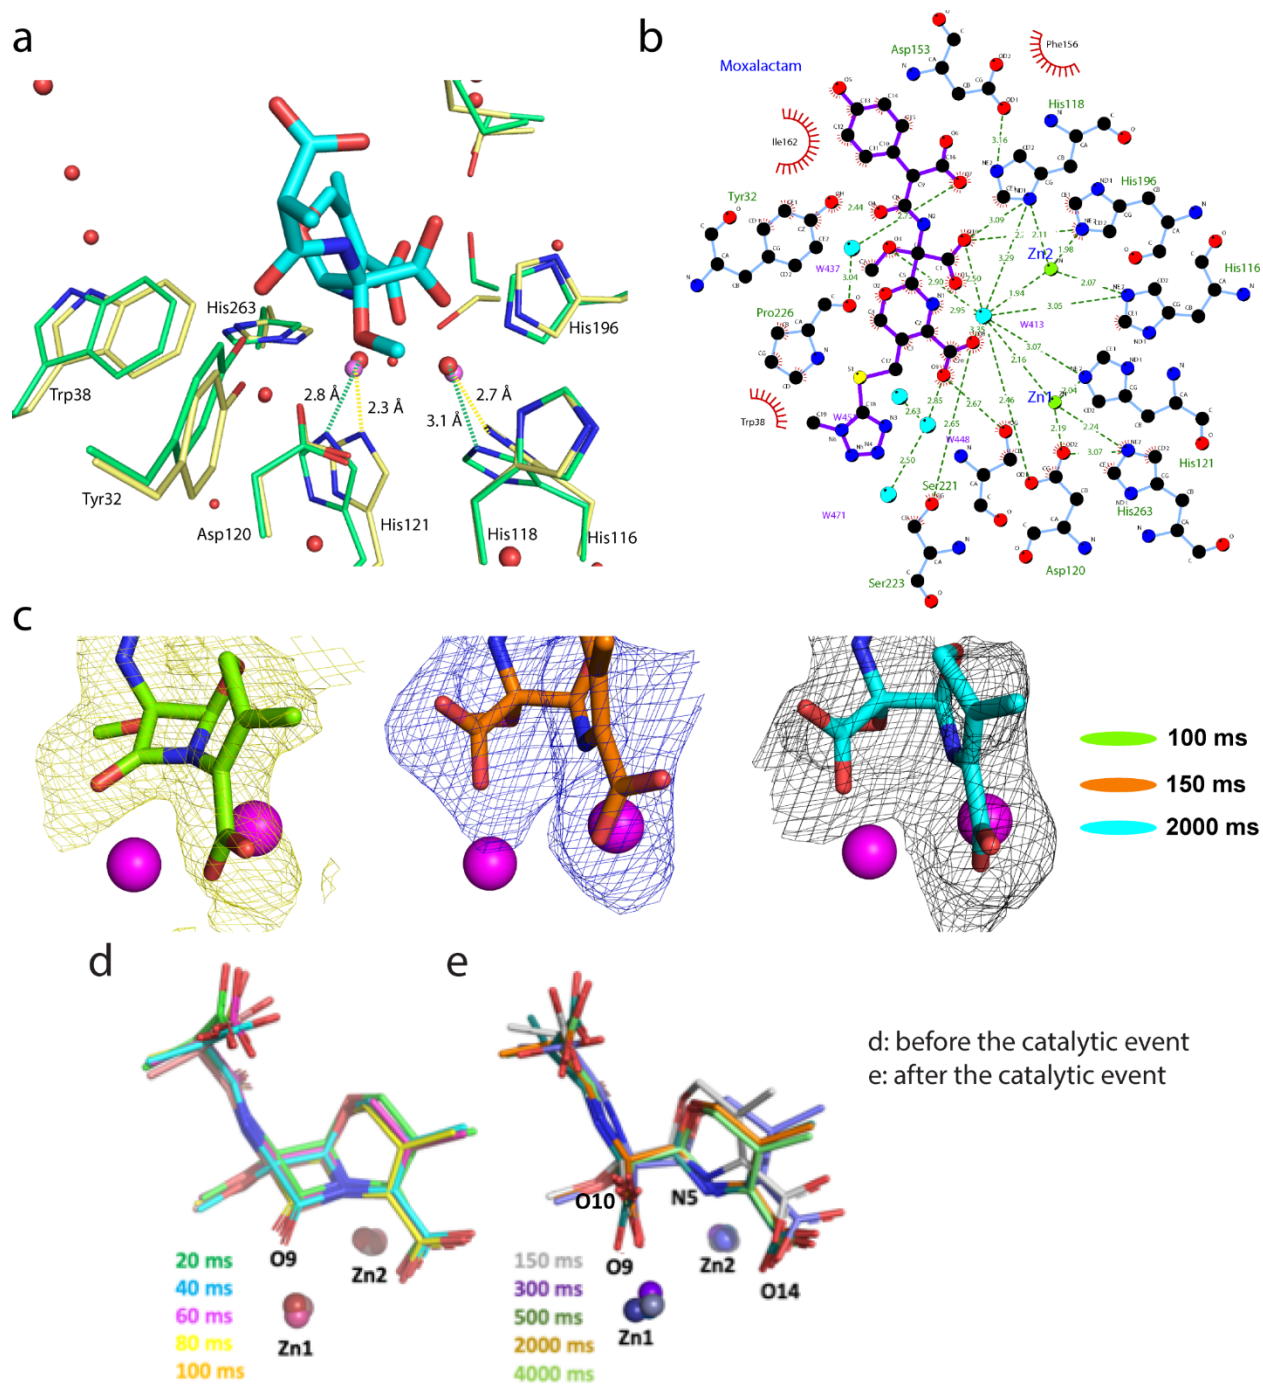

**Supplementary Figure 4.** Details of active site of L1 MBL. **a.** Comparison of sidechain positions in an active site of L1 MBL: crystal structure after EDTA treatment with waters in active site (green sticks), crystal structure at 2000 ms time point (yellow sticks – sidechain, moxalactam—aqua, zincs purple) **b.** Hydrogen bonds and hydrophobic interactions of the hydrolyzed moxalactam bound by L1 active site, structure determined using “pink” beam SSX (PDB entry 7L91). Moxalactam illustrated as purple stick,

two zinc ions depicted as green spheres. Diagram made using LIGPLOT v.4.5.3 software <sup>1</sup>. **c.** Time-resolved details of electron density observed *in crystallo* reaction of  $\beta$ -lactam ring cleavage of moxalactam by L1 MBL. The 2Fo-Fc polder OMIT maps countered at 2.0  $\sigma$  level (carved at 2 Å) around moxalactam. Maps depicted as the olive mesh for 100 ms, blue mesh for 150 ms, and black mesh for 2000 ms, zinc ions are in pink. Polder OMIT maps calculated using Phenix <sup>2</sup> with the exclusion of bulk solvent in radius of 5 Å from moxalactam, resolution factor 0.25 were used during calculation. **d.** Comparison of moxalactam movement in the L1 MBL active site observed from 20-100 ms after UV-pulse (before reaction). **e.** Moxalactam conformation changes after reaction, time steps 150-4000 ms.

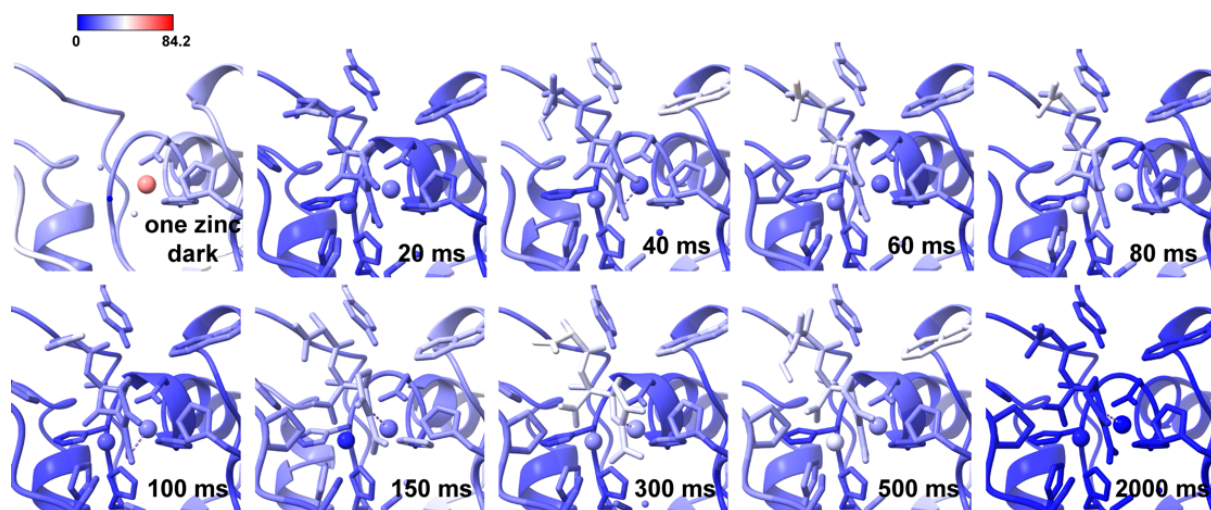

**Supplementary Figure 5.** B-factors change over the time course of  $\beta$ -lactam ring cleavage of moxalactam by L1 MBL. Crystal structures of L1 MBL dark-set and time-resolved structures determined at time points from 20 to 2000 ms. The bar (from high B-factor red to low B-factor blue) shows the range of B-factors.

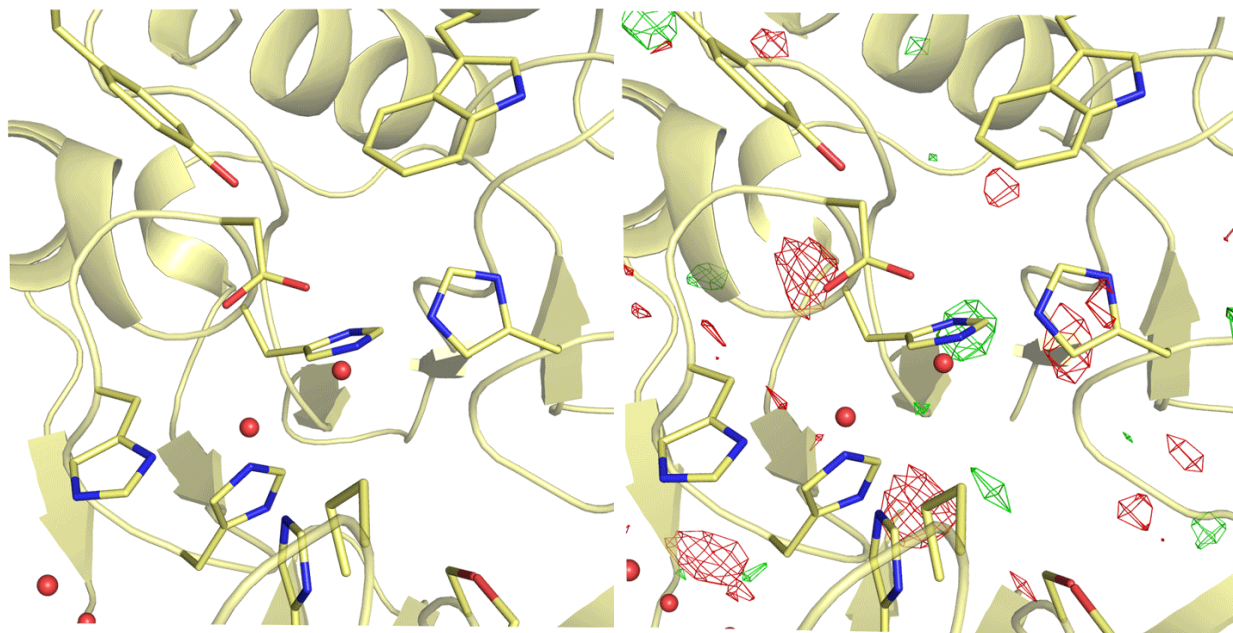

**Supplementary Figure 6.** Snapshots of moxalactam cleavage by L1 from *S. maltophilia* captured by TR-SSX (20 – 4000 ms). Protein is in yellow, zinc ions in magenta, water molecules are labelled red, moxalactam is in stick representation with carbon atoms in green prior  $\beta$ -lactam cleavage, orange right after cleavage (150 ms) and blue in the final product during conformational adjustments. **a.** shows model of moxalactam in the L1 active site; **b.** shows electron density for the ligand (blue mesh) and additional electron density in the active site (green is positive and red in negative). The 2Fo-Fc map contoured at 1.0  $\sigma$  level (carved at 1.4 Å). The Fo-Fc electron density maps labeled as green and red, respectively for 3.2 and -3.2  $\sigma$  level.

**Supplementary Table 1A.** SSX data collection and processing statistic of L1  $\beta$ -lactamase crystals.

|                                  | <b>hydrolyzed mox</b> | <b>dark</b>      | <b>no zinc</b> | <b>one zinc</b> | <b>20 ms</b>     | <b>40 ms</b>     | <b>60 ms</b>     |
|----------------------------------|-----------------------|------------------|----------------|-----------------|------------------|------------------|------------------|
| Diffraction source               | 14-ID-B APS           | 14-ID-B APS      | 19-ID APS      | 19-ID APS       | 14-ID-B APS      | 14-ID-B APS      | 14-ID-B APS      |
| Wavelength (Å)                   | 1.02-1.18             | 1.02-1.18        | 0.9792         | 0.9792          | 1.02-1.18        | 1.02-1.18        | 1.02-1.18        |
| Temperature (K)                  | 295                   | 295              | 295            | 295             | 295              | 295              | 295              |
| Detector                         | RAYONIX MX340-HS      | RAYONIX MX340-HS | PILATUS3 X 6M  | PILATUS3 X 6M   | RAYONIX MX340-HS | RAYONIX MX340-HS | RAYONIX MX340-HS |
| X-ray pulse length               | 24 x 100 ps           | 24 x 100 ps      | 40 ms          | 60 ms           | 24 x 100 ps      | 24 x 100 ps      | 24 x 100 ps      |
| Beam size (μm)                   | 60 x 60               | 60 x 60          | 50 x 50        | 75 x 75         | 60 x 60          | 60 x 60          | 60 x 60          |
| APS bunch mode (pulses)          | 24                    | 24               | –              | –               | 24               | 24               | 24               |
| X-ray dose (kGy)                 | 16.8                  | 16.8             | 16.4           | 11.4            | 16.8             | 16.8             | 16.8             |
| Laser size (μm)                  | off                   | off              | –              | –               | 100 x 80         | 100 x 80         | 100 x 80         |
| ALEX step size (μm)              | 200 x 200             | 130 x 180        | 50 x 50        | 75 x 75         | 200 x 250        | 200 x 250        | 200 x 250        |
| Scan size x/y (steps)            | 41 x 55               | 60 x 60          | 120 x 150      | 175 x 220       | 42 x 45          | 42 x 45          | 42 x 45          |
| Detector distance (mm)           | 300                   | 300              | 350            | 350             | 300              | 300              | 300              |
| Number of chips                  | 1                     | 1                | 1              | 1               | 3                | 2                | 3                |
| Number of collected images       | 19,316                | 5,000            | 38,500         | 18,000          | 5,670            | 3,780            | 5,670            |
| Hit-finder (spots/intensity)     | 60/60                 | 50/60            | –              | –               | 30/30            | 30/30            | 30/30            |
| Number of crystal hits           | 7,816                 | 1,210            | 5191           | 3374            | 2,578            | 2,921            | 2,324            |
| Crystal hit rate (%)             | 40.5                  | 24.2             | 13.5           | 18.7            | 45.5             | 77.3             | 41.0             |
| Number of indexed images         | 2301                  | 355              | 4550           | 2947            | 526              | 533              | 467              |
| Indexing hit rate (%)            | 29.4                  | 29.3             | 87.6           | 87.3            | 20.4             | 18.2             | 20.1             |
| <b>Number of merged lattices</b> | <b>583</b>            | <b>143</b>       | <b>4550</b>    | <b>2947</b>     | <b>214</b>       | <b>198</b>       | <b>161</b>       |
| Images merged/indexed (%)        | 25.3                  | 40.3             | 100            | 100             | 40.7             | 37.1             | 34.5             |
| <b>PDB Accession Code</b>        | <b>7L91</b>           | <b>7UHR</b>      | <b>7UHS</b>    | <b>7UHT</b>     | <b>7UHH</b>      | <b>7UHI</b>      | <b>7UHJ</b>      |



**Supplementary Table 1B.** SSX data collection and processing statistic of L1  $\beta$ -lactamase crystals.

|                                  | 80 ms            | 100 ms           | 150 ms           | 300 ms           | 500 ms           | 2000 ms          | 4000 ms          |
|----------------------------------|------------------|------------------|------------------|------------------|------------------|------------------|------------------|
| Diffraction source               | 14-ID-B APS      | 14-ID-B APS      | 14-ID-B APS      | 14-ID-B APS      | 14-ID-B APS      | 14-ID-B APS      | 14-ID-B APS      |
| Wavelength (Å)                   | 1.02-1.18        | 1.02-1.18        | 1.02-1.18        | 1.02-1.18        | 1.02-1.18        | 1.02-1.18        | 1.02-1.18        |
| Temperature (K)                  | 295              | 295              | 295              | 295              | 295              | 295              | 295              |
| Detector                         | RAYONIX MX340-HS | RAYONIX MX340-HS | RAYONIX MX340-HS | RAYONIX MX340-HS | RAYONIX MX340-HS | RAYONIX MX340-HS | RAYONIX MX340-HS |
| X-ray pulse length               | 24 x 100 ps      | 24 x 100 ps      | 48 x 100 ps      | 24 x 100 ps      | 24 x 100 ps      | 48 x 100 ps      | 48 x 100 ps      |
| Beam size (μm)                   | 60 x 60          | 60 x 60          | 30 x 30          | 60 x 60          | 60 x 60          | 30 x 30          | 30 x 30          |
| APS bunch mode (pulses)          | 24               | 24               | 48               | 48               | 48               | 48               | 48               |
| X-ray dose (kGy)                 | 16.8             | 16.8             | 33.6             | 33.6             | 33.6             | 33.6             | 33.6             |
| Laser size (μm)                  | 100 x 80         | 100 x 80         | 100 x 80         | 100 x 80         | 100 x 80         | 100 x 80         | 100 x 80         |
| ALEX step size (μm)              | 42 x 45          | 42 x 45          | 42 x 36          | 42 x 35          | 42 x 30          | 42 x 30          | 42 x 24          |
| Scan size x/y (steps)            | 200 x 250        | 200 x 250        | 200 x 315        | 200 x 315        | 200 x 380        | 200 x 380        | 200 x 450        |
| Detector distance (mm)           | 300              | 300              | 300              | 300              | 300              | 300              | 300              |
| Number of chips                  | 3                | 3                | 4                | 3                | 4                | 7                | 5                |
| Number of collected images       | 5,753            | 5,670            | 6,048            | 4,410            | 5,040            | 7,713            | 4,032            |
| Hit-finder (spots/intensity)     | 30/30            | 30/30            | 40/30            | 30/30            | 30/30            | 30/30            | 30/25            |
| Number of crystal hits           | 2,127            | 2,746            | 2,847            | 1,915            | 2,339            | 4,025            | 2,200            |
| Crystal hit rate (%)             | 37.0             | 48.4             | 47.1             | 43.4             | 46.4             | 52.2             | 54.6             |
| Number of indexed images         | 316              | 476              | 734              | 230              | 379              | 543              | 347              |
| Indexing hit rate (%)            | 14.9             | 17.3             | 25.8             | 12.0             | 16.2             | 13.5             | 15.8             |
| <b>Number of merged lattices</b> | <b>122</b>       | <b>191</b>       | <b>316</b>       | <b>99</b>        | <b>154</b>       | <b>265</b>       | <b>166</b>       |
| Images merged/indexed (%)        | 38.6             | 40.1             | 43.1             | 43.0             | 40.6             | 48.8             | 47.8             |
| <b>PDB Accession Code</b>        | <b>7UHK</b>      | <b>7UHL</b>      | <b>7UHM</b>      | <b>7UHN</b>      | <b>7UHO</b>      | <b>7UHP</b>      | <b>7UHQ</b>      |

**Supplementary Table 2A.** L1  $\beta$ -lactamase crystallographic data and refinement statistics.

|                                                                                                        | hydrolyzed mox                | dark                          | no zinc                       | one zinc                      | 20 ms                         | 40 ms                         | 60 ms                         |
|--------------------------------------------------------------------------------------------------------|-------------------------------|-------------------------------|-------------------------------|-------------------------------|-------------------------------|-------------------------------|-------------------------------|
| Ligands                                                                                                | two zincs<br>hydrolyzed mox   | one zinc in active site       | two waters in active site     | one zinc                      | two zincs<br>substrate mox    | two zincs<br>substrate mox    | two zincs<br>substrate mox    |
| Space group                                                                                            | <i>P6<sub>4</sub>22</i>       | <i>P6<sub>4</sub>22</i>       | <i>P6<sub>4</sub>22</i>       | <i>P6<sub>4</sub>22</i>       | <i>P6<sub>4</sub>22</i>       | <i>P6<sub>4</sub>22</i>       | <i>P6<sub>4</sub>22</i>       |
| <i>a</i> , <i>b</i> , <i>c</i> (Å)                                                                     | 105.85, 105.85, 99.10         | 105.85, 105.85, 99.10         | 105.95, 105.95, 99.89         | 106.09, 106.09, 99.77         | 105.85, 105.85, 99.10         | 105.85, 105.85, 99.10         | 105.85, 105.85, 99.10         |
| Resolution range (Å) <sup>a</sup>                                                                      | 33.03 – 2.20                  | 26.01 – 2.20                  | 46.80 – 2.20                  | 46.84 – 2.20                  | 33.03 – 2.20                  | 33.03 – 2.20                  | 28.39 – 2.20                  |
| Res. range in upper bin (Å) <sup>a</sup>                                                               | (2.30 – 2.20)                 | (2.30 – 2.20)                 | (2.24 – 2.20)                 | (2.24 – 2.20)                 | (2.30 – 2.20)                 | (2.30 – 2.20)                 | (2.30 – 2.20)                 |
| No. of unique reflections                                                                              | 14,754 (1,143)                | 12,094 (593)                  | 17,385 (865)                  | 17,389 (861)                  | 12,926 (729)                  | 12,800 (703)                  | 12,501 (671)                  |
| Completeness (%)                                                                                       | 86.4 (55.6)                   | 70.8 (28.8)                   | 100.0 (100.0)                 | 100.0 (100.0)                 | 75.7 (35.4)                   | 74.9 (34.11)                  | 73.3 (32.7)                   |
| Data redundancy                                                                                        | 35.4                          | 9.2                           | 76.5                          | 54.3                          | 13.1                          | 12.1                          | 10.4                          |
| R <sub>merge</sub> (%) <sup>b</sup> or <u>R<sub>split</sub> (%)</u> <sup>c</sup>                       | 13.4 (12.2)                   | 12.1 (10.4)                   | <u>24.54 (97.48)</u>          | <u>27.73 (82.19)</u>          | 13.3 (11.9)                   | 13.6 (12.2)                   | 13.1 (11.8)                   |
| CC <sub>1/2</sub> <sup>d</sup>                                                                         | –                             | –                             | 95.46 (40.89)                 | 90.84 (52.35)                 | –                             | –                             | –                             |
| <u><math>\langle I/\sigma(I) \rangle</math></u> or <u><math>\langle F^2/\sigma(F^2) \rangle</math></u> | <u>30.51</u>                  | <u>20.2</u>                   | 2.51 (0.39)                   | 2.99 (0.50)                   | <u>21.1</u>                   | <u>20.0</u>                   | <u>19.3</u>                   |
| Wilson <i>B</i> factor                                                                                 | 22.2                          | 13.5                          | 31.7                          | 34.3                          | 11.2                          | 9.2                           | 14.5                          |
| <b>Refinement (MR model)</b>                                                                           | 7L52                          | 7L52                          | 7L52                          | 7L52                          | 7L91                          | 7L91                          | 7L91                          |
| Resolution range (Å)                                                                                   | 33.03 – 2.20<br>(2.34 – 2.20) | 26.01 – 2.20<br>(2.42 – 2.20) | 46.80 – 2.20<br>(2.34 – 2.20) | 46.87 – 2.20<br>(2.34 – 2.20) | 33.03 – 2.20<br>(2.42 – 2.20) | 33.03 – 2.20<br>(2.42 – 2.20) | 28.39 – 2.20<br>(2.42 – 2.20) |
| Completeness (%)                                                                                       | 85.7 (58.5)                   | 70.1 (39.0)                   | 99.4 (97.0)                   | 100.0 (100.0)                 | 75.1 (45.0)                   | 74.5 (44.0)                   | 72.7 (42.0)                   |
| No. of unique reflections                                                                              | 14,723 (1,546)                | 12,031 (1,540)                | 17,255 (2,589)                | 17,383 (2,683)                | 12,887 (1,793)                | 12,761 (1,750)                | 12,453 (1,674)                |
| <i>R</i> <sub>work</sub> / <i>R</i> <sub>free</sub> <sup>e</sup> (%)                                   | 18.14/20.75<br>(20.30/ 22.16) | 22.18/24.36<br>(27.63/27.23)  | 22.14/25.77<br>(32.35/34.12)  | 21.45/25.39<br>(32.70/35.34)  | 22.34/26.20<br>(30.82/37.84)  | 23.06/26.61<br>(28.23/32.32)  | 20.27/23.83<br>(24.85/27.90)  |
| Protein chains/atoms                                                                                   | 1/1,986                       | 1/1,986                       | 1/1,981                       | 1/1,986                       | 1/1,986                       | 1/1,986                       | 1/1,986                       |
| Ligands/Solvent atoms                                                                                  | 39/71                         | 1/72                          | 0/35                          | 1/45                          | 25/50                         | 25/53                         | 25/55                         |
| Mean <i>B</i> factor (Å <sup>2</sup> )                                                                 | 26.9                          | 28.9                          | 45.1                          | 37.2                          | 20.6                          | 13.6                          | 18.8                          |
| R.m.s.d. bonds (Å)                                                                                     | 0.003                         | 0.001                         | 0.001                         | 0.002                         | 0.003                         | 0.002                         | 0.001                         |
| R.m.s.d. angles (°)                                                                                    | 0.627                         | 0.401                         | 0.430                         | 0.530                         | 0.589                         | 0.519                         | 0.523                         |
| <b>Ramachandran plot</b> <sup>f</sup>                                                                  |                               |                               |                               |                               |                               |                               |                               |
| Favored (%)                                                                                            | 96.2                          | 94.6                          | 95.4                          | 96.6                          | 93.9                          | 95.4                          | 95.0                          |
| Allowed (%)                                                                                            | 3.8                           | 5.0                           | 4.6                           | 3.4                           | 6.1                           | 4.2                           | 5.0                           |
| Outside allowed (%)                                                                                    | 0.0                           | 0.4                           | 0.0                           | 0.0                           | 0.0                           | 0.4                           | 0.0                           |
| Clashscore                                                                                             | 1.0                           | 2.0                           | 2.0                           | 1.3                           | 1.8                           | 2.3                           | 1.0                           |
| <b>PDB Accession Code</b>                                                                              | <b>7L91</b>                   | <b>7UHR</b>                   | <b>7UHS</b>                   | <b>7UHT</b>                   | <b>7UHH</b>                   | <b>7UHI</b>                   | <b>7UHJ</b>                   |



**Supplementary Table 2B.** L1  $\beta$ -lactamase crystal crystallographic data and refinement statistics.

|                                                                      | 80 ms                         | 100 ms                        | 150 ms                        | 300 ms                        | 500 ms                        | 2000 ms                       | 4000 ms                      |
|----------------------------------------------------------------------|-------------------------------|-------------------------------|-------------------------------|-------------------------------|-------------------------------|-------------------------------|------------------------------|
| Ligands                                                              | two zincs<br>substrate mox    | two zincs<br>substrate mox    | two zincs<br>hydrolyzed mox   | two zincs<br>hydrolyzed mox   | two zincs<br>hydrolyzed mox   | two zincs<br>hydrolyzed mox   | two zincs<br>hydrolyzed mox  |
| Space group                                                          | <i>P</i> 6 <sub>4</sub> 22    | <i>P</i> 6 <sub>4</sub> 22    | <i>P</i> 6 <sub>4</sub> 22    | <i>P</i> 6 <sub>4</sub> 22    | <i>P</i> 6 <sub>4</sub> 22    | <i>P</i> 6 <sub>4</sub> 22    | <i>P</i> 6 <sub>4</sub> 22   |
| <i>a</i> , <i>b</i> , <i>c</i> (Å)                                   | 105.85, 105.85, 99.10         | 105.85, 105.85, 99.10         | 105.85, 105.85, 99.10         | 105.85, 105.85, 99.10         | 105.85, 105.85, 99.10         | 105.85, 105.85, 99.10         | 105.85, 105.85, 99.10        |
| Resolution range (Å) <sup>a</sup>                                    | 31.08 – 2.20                  | 31.08 – 2.20                  | 34.64 – 2.20                  | 33.03 – 2.20                  | 31.08 – 2.20                  | 33.65 – 2.20                  | 33.65–2.20                   |
| Res. range in upper bin (Å) <sup>a</sup>                             | (2.30 – 2.20)                 | (2.30 – 2.20)                 | (2.30 – 2.20)                 | (2.30 – 2.20)                 | (2.30 – 2.20)                 | (2.30 – 2.20)                 | (2.30 – 2.20)                |
| No. of unique reflections                                            | 11,936 (595)                  | 12,754 (757)                  | 12,098 (585)                  | 10,982 (452)                  | 12,324 (670)                  | 11,732 (448)                  | 11,599 (499)                 |
| Completeness (%)                                                     | 70.0 (28.9)                   | 74.7 (36.9)                   | 71.0 (28.3)                   | 64.2 (21.9)                   | 72.2 (32.6)                   | 68.6 (21.7)                   | 67.8 (24.3)                  |
| Data redundancy                                                      | 8.0                           | 11.8                          | 15.3                          | 6.5                           | 9.7                           | 12.8                          | 10.1                         |
| R <sub>merge</sub> (%) <sup>b</sup>                                  | 12.7 (11.0)                   | 13.4 (11.2)                   | 13.6 (10.3)                   | 12.6 (9.1)                    | 13.3 (11.6)                   | 16.1 (9.3)                    | 12.6 (10.7)                  |
| CC <sub>1/2</sub> <sup>d</sup>                                       | –                             | –                             | –                             | –                             | –                             | –                             | –                            |
| $\langle I/\sigma(I) \rangle$ or $\langle F^2/\sigma(F^2) \rangle$   | <u>18.3</u>                   | <u>19.9</u>                   | <u>23.0</u>                   | <u>17.3</u>                   | <u>18.6</u>                   | <u>18.1</u>                   | <u>20.5</u>                  |
| Wilson <i>B</i> factor                                               | 11.3                          | 10.1                          | 5.7                           | 9.6                           | 10.1                          | 4.5                           | 7.0                          |
| <b>Refinement</b> (MR model)                                         | 7L91                          | 7L91                          | 7L91                          | 7L91                          | 7L91                          | 7L91                          | 7L91                         |
| Resolution range (Å)                                                 | 31.08 – 2.20<br>(2.42 – 2.20) | 31.08 – 2.20<br>(2.42 – 2.20) | 34.64 – 2.70<br>(3.09 – 2.70) | 33.03 – 2.20<br>(2.42 – 2.20) | 31.08 – 2.20<br>(2.42 – 2.20) | 33.65 – 2.60<br>(2.98 – 2.60) | 33.65–2.20<br>(2.43–2.20)    |
| Completeness (%)                                                     | 69.4 (37.0)                   | 74.0 (45.0)                   | 88.6 (79.0)                   | 63.4 (29.0)                   | 71.7 (42.0)                   | 85.2 (73.0)                   | 67.6 (34.0)                  |
| No. of unique reflections                                            | 11,882 (1,484)                | 12,691 (1,795)                | 8,383 (2,314)                 | 10,918 (518)                  | 12,282 (1,645)                | 8,995 (2,359)                 | 11,547 (1,335)               |
| <i>R</i> <sub>work</sub> / <i>R</i> <sub>free</sub> <sup>c</sup> (%) | 19.44/24.38<br>(24.12/26.11)  | 20.16/24.53<br>(26.16/31.36)  | 23.50/29.01<br>(33.99/38.45)  | 19.91/24.63<br>(23.65/25.47)  | 20.86/25.24<br>(24.38/27.54)  | 25.06/27.54<br>(32.93/40.44)  | 23.31/26.44<br>(29.77/33.58) |
| Protein chains/atoms                                                 | 1/1,986                       | 1/1,986                       | 1/1,986                       | 1/1,986                       | 1/1,986                       | 1/1,986                       | 1/1,986                      |
| Ligands/Solvent atoms                                                | 25/73                         | 25/84                         | 26/45                         | 26/86                         | 26/86                         | 26/47                         | 26/60                        |
| Mean <i>B</i> factor (Å <sup>2</sup> )                               | 16.2                          | 15.3                          | 22.3                          | 15.2                          | 15.0                          | 4.8                           | 24.9                         |
| R.m.s.d. bonds (Å)                                                   | 0.002                         | 0.002                         | 0.002                         | 0.002                         | 0.002                         | 0.002                         | 0.002                        |
| R.m.s.d. angles (°)                                                  | 0.519                         | 0.526                         | 0.543                         | 0.501                         | 0.467                         | 0.505                         | 0.482                        |
| <b>Ramachandran plot</b> <sup>f</sup>                                |                               |                               |                               |                               |                               |                               |                              |
| Favored (%)                                                          | 94.6                          | 95.0                          | 91.6                          | 95.8                          | 95.4                          | 94.3                          | 94.3                         |
| Allowed (%)                                                          | 5.0                           | 5.0                           | 7.3                           | 4.2                           | 4.6                           | 5.7                           | 5.3                          |
| Outside allowed (%)                                                  | 0.4                           | 0.0                           | 1.1                           | 0.0                           | 0.0                           | 0.0                           | 0.4                          |
| Clashscore                                                           | 1.8                           | 2.3                           | 3.8                           | 2.0                           | 2.5                           | 3.5                           | 2.5                          |
| <b>PDB Accession Code</b>                                            | <b>7UHK</b>                   | <b>7UHL</b>                   | <b>7UHM</b>                   | <b>7UHN</b>                   | <b>7UHO</b>                   | <b>7UHP</b>                   | <b>7UHQ</b>                  |

<sup>a</sup>Values in parentheses correspond to the highest resolution shell.

<sup>b</sup> $R_{\text{merge}} = \sum_h \sum_j |I_{hj} - \langle I_h \rangle| / \sum_h \sum_j I_{hj}$ , where  $I_{hj}$  is the intensity of observation  $j$  of reflection  $h$ .

<sup>c</sup> $R_{\text{split}}$  as defined by White<sup>3</sup>.

<sup>d</sup>CC<sub>1/2</sub> as defined by Karplus and Diederichs<sup>4</sup>

<sup>e</sup> $R = \sum_h |F_o| - |F_c| / \sum_h |F_o|$  for all reflections, where  $F_o$  and  $F_c$  are observed and calculated structure factors, respectively.  $R_{\text{free}}$  is calculated analogously for the test reflections, randomly selected and excluded from the refinement.

<sup>f</sup>As defined by Molprobit<sup>5</sup>.

**Supplementary Table 3.** Atomic distances (Å) after comparison of atom positions at specific time point to 20 ms data. (Module from difference of atomic distances measured at T and at T<sub>20ms</sub>)

|                       | 40 ms | 60 ms | 100 ms | 150 ms      | 300 ms      | 500 ms      | 2000 ms     | 4000 ms     |
|-----------------------|-------|-------|--------|-------------|-------------|-------------|-------------|-------------|
| <b>Zn1 - O9</b>       | 0.23  | 0.14  | 0.24   | 0.28        | 0.49        | <b>0.63</b> | <b>0.67</b> | <b>0.63</b> |
| <b>Zn1 - C8</b>       | 0.32  | 0.04  | 0.29   | 0.45        | 0.19        | 0.12        | 0.04        | 0.14        |
| <b>Zn1 - C6</b>       | 0.40  | 0.03  | 0.36   | 0.08        | <b>0.51</b> | 0.06        | 0.43        | 0.08        |
| <b>Zn1 - C7</b>       | 0.39  | 0.02  | 0.30   | 0.04        | 0.34        | 0.04        | 0.44        | 0.15        |
| <b>Zn1 - N5</b>       | 0.27  | 0.03  | 0.26   | <b>0.59</b> | 0.04        | 0.05        | 0.21        | 0.13        |
| <b>Zn1 - C4</b>       | 0.07  | 0.08  | 0.13   | <b>1.04</b> | <b>0.51</b> | 0.17        | 0.02        | 0.21        |
| <b>Zn2 - O9</b>       | 0.02  | 0.04  | 0.09   | <b>0.60</b> | 0.28        | 0.39        | 0.39        | 0.49        |
| <b>Zn2 - C8</b>       | 0.13  | 0.08  | 0.15   | <b>0.59</b> | <b>0.69</b> | <b>0.57</b> | <b>0.73</b> | <b>0.65</b> |
| <b>Zn2 - C6</b>       | 0.39  | 0.17  | 0.31   | 0.11        | 0.45        | 0.08        | 0.10        | 0.11        |
| <b>Zn2 - C7</b>       | 0.31  | 0.18  | 0.17   | 0.06        | 0.21        | 0.10        | 0.13        | 0.16        |
| <b>Zn2 - N5</b>       | 0.09  | 0.02  | 0.21   | 0.36        | 0.46        | <b>0.51</b> | <b>0.52</b> | <b>0.54</b> |
| <b>Zn2 - C4</b>       | 0.23  | 0.29  | 0.13   | 0.43        | 0.16        | 0.08        | 0.16        | 0.14        |
| <b>N5 - C8</b>        | 0.00  | 0.00  | 0.00   | <b>1.24</b> | <b>1.23</b> | <b>1.21</b> | <b>1.35</b> | <b>1.32</b> |
| <b>N5 - O9</b>        | 0.00  | 0.00  | 0.00   | 0.37        | 0.43        | <b>0.54</b> | 0.41        | 0.40        |
| <b>N5 - C4</b>        | 0.00  | 0.00  | 0.00   | 0.01        | 0.01        | 0.01        | 0.01        | 0.01        |
| <b>N5 - O14</b>       | 0.01  | 0.00  | 0.00   | <b>0.91</b> | <b>0.87</b> | <b>0.92</b> | <b>0.94</b> | <b>0.93</b> |
| <b>N5 - C2</b>        | 0.01  | 0.00  | 0.00   | 0.24        | 0.15        | 0.18        | 0.19        | 0.19        |
| <b>D120 OD1 - N5</b>  | 0.20  | 0.26  | 0.02   | 0.02        | 0.29        | 0.07        | 0.11        | 0.06        |
| <b>D120 OD2 - N5</b>  | 0.31  | 0.05  | 0.07   | 0.09        | 0.29        | 0.38        | 0.47        | 0.39        |
| <b>D120 OD1 - Zn2</b> | 0.27  | 0.19  | 0.21   | 0.10        | 0.13        | 0.14        | 0.33        | 0.10        |



**Supplementary Table 4.** Atomic distances (Å) measured during TR reaction of catalysis of the  $\beta$ -lactam ring by L1 MBL.

|                       | 20 ms | 40 ms | 60 ms | 100 ms | 150 ms | 300 ms | 500 ms | 2000 ms | 4000 ms |
|-----------------------|-------|-------|-------|--------|--------|--------|--------|---------|---------|
| <b>Zn1 – O9</b>       | 2.76  | 2.53  | 2.63  | 2.53   | 2.49   | 2.27   | 2.14   | 2.10    | 2.13    |
| <b>Zn1 – C8</b>       | 3.20  | 2.88  | 3.16  | 2.91   | 3.65   | 3.39   | 3.32   | 3.24    | 3.35    |
| <b>Zn1 – C6</b>       | 4.66  | 4.25  | 4.69  | 4.30   | 4.73   | 4.14   | 4.60   | 4.22    | 4.58    |
| <b>Zn1 – C7</b>       | 4.28  | 3.89  | 4.30  | 3.98   | 4.31   | 3.94   | 4.24   | 3.84    | 4.12    |
| <b>Zn1 – N5</b>       | 3.70  | 3.43  | 3.72  | 3.44   | 4.28   | 3.66   | 3.74   | 3.49    | 3.83    |
| <b>Zn1 – C4</b>       | 4.25  | 4.18  | 4.33  | 4.12   | 5.29   | 4.76   | 4.42   | 4.23    | 4.47    |
| <b>Zn2 – O9</b>       | 4.11  | 4.09  | 4.07  | 4.02   | 3.51   | 3.84   | 3.72   | 3.73    | 3.63    |
| <b>Zn2 – C8</b>       | 3.52  | 3.40  | 3.44  | 3.38   | 4.12   | 4.21   | 4.10   | 4.26    | 4.17    |
| <b>Zn2 – C6</b>       | 3.34  | 2.95  | 3.17  | 3.03   | 3.23   | 2.89   | 3.26   | 3.24    | 3.23    |
| <b>Zn2 – C7</b>       | 4.12  | 3.81  | 3.94  | 3.95   | 4.06   | 3.91   | 4.02   | 3.99    | 3.96    |
| <b>Zn2 – N5</b>       | 2.76  | 2.67  | 2.78  | 2.55   | 2.40   | 2.30   | 2.25   | 2.24    | 2.21    |
| <b>Zn2 – C4</b>       | 2.88  | 3.10  | 3.17  | 2.75   | 3.31   | 3.04   | 2.96   | 3.04    | 3.02    |
| <b>N5 – C8</b>        | 1.37  | 1.37  | 1.37  | 1.37   | 2.61   | 2.60   | 2.58   | 2.72    | 2.70    |
| <b>N5 – O9</b>        | 2.36  | 2.36  | 2.36  | 2.36   | 2.73   | 2.79   | 2.90   | 2.77    | 2.76    |
| <b>N5 – C4</b>        | 1.38  | 1.39  | 1.38  | 1.38   | 1.37   | 1.38   | 1.37   | 1.38    | 1.37    |
| <b>N5 – O14</b>       | 3.61  | 3.62  | 3.62  | 3.61   | 2.70   | 2.74   | 2.70   | 2.67    | 2.68    |
| <b>N5 – C2</b>        | 2.53  | 2.53  | 2.53  | 2.53   | 2.76   | 2.68   | 2.71   | 2.72    | 2.72    |
| <b>D120 OD1 – N5</b>  | 4.56  | 4.76  | 4.81  | 4.54   | 4.57   | 4.84   | 4.49   | 4.44    | 4.50    |
| <b>D120 OD2 – N5</b>  | 3.89  | 4.20  | 3.94  | 3.83   | 3.80   | 3.60   | 3.51   | 3.42    | 3.50    |
| <b>D120 OD1 – Zn2</b> | 3.37  | 3.10  | 3.18  | 3.58   | 3.46   | 3.49   | 3.22   | 3.04    | 3.26    |

**Supplementary Table 5.** Occupancies and B-factors of moxalactam and zincs atoms in L1  $\beta$ -lactamase crystal structures.

|                                        | <b>hydrolyzed mox</b>       | <b>dark</b>                | <b>no zinc</b>              | <b>one zinc</b>             | <b>20 ms</b>                | <b>40 ms</b>                | <b>60 ms</b>                |
|----------------------------------------|-----------------------------|----------------------------|-----------------------------|-----------------------------|-----------------------------|-----------------------------|-----------------------------|
| <b>Ligands</b>                         | two zincs<br>hydrolyzed mox | one zinc in active site    | two waters in active site   | one zinc                    | two zincs<br>substrate mox  | two zincs<br>substrate mox  | two zincs<br>substrate mox  |
| Mean B factor ( $\text{\AA}^2$ )       | 26.9                        | 28.9                       | 45.1                        | 37.2                        | 20.6                        | 13.6                        | 18.8                        |
| Occupancy moxalactam (%)               | 100                         | -                          | -                           | -                           | 70                          | 80                          | 83                          |
| B-factor ( $\text{\AA}^2$ ) moxalactam | 41.0                        | -                          | -                           | -                           | 21.2                        | 13.2                        | 21.3                        |
| Occupancy Zn1 (%)                      | 82.0                        | -                          | -                           | 79.0                        | 59.0                        | 49.0                        | 53.0                        |
| B-factor ( $\text{\AA}^2$ ) Zn1        | 14.4                        | -                          | -                           | 29.1                        | 17.6                        | 12.8                        | 19.1                        |
| Occupancy Zn2 (%)                      | 80.0                        | 100                        | -                           | -                           | 58                          | 77                          | 73                          |
| B-factor ( $\text{\AA}^2$ ) Zn2        | 13.0                        | 62.0                       | -                           | -                           | 14.4                        | 18.2                        | 15.2                        |
| <b>PDB Accession Code</b>              | <b>7L91</b>                 | <b>7UHR</b>                | <b>7UHS</b>                 | <b>7UHT</b>                 | <b>7UHH</b>                 | <b>7UHI</b>                 | <b>7UHJ</b>                 |
|                                        |                             |                            |                             |                             |                             |                             |                             |
|                                        | <b>80 ms</b>                | <b>100 ms</b>              | <b>150 ms</b>               | <b>300 ms</b>               | <b>500 ms</b>               | <b>2000 ms</b>              | <b>4000 ms</b>              |
| <b>Ligands</b>                         | two zincs<br>substrate mox  | two zincs<br>substrate mox | two zincs<br>hydrolyzed mox | two zincs<br>hydrolyzed mox | two zincs<br>hydrolyzed mox | two zincs<br>hydrolyzed mox | two zincs<br>hydrolyzed mox |
| Mean B factor ( $\text{\AA}^2$ )       | 16.2                        | 15.3                       | 22.3                        | 15.2                        | 15.0                        | 4.8                         | 24.9                        |
| Occupancy moxalactam (%)               | 87                          | 73                         | 77                          | 68                          | 81                          | 90                          | 85                          |
| B-factor ( $\text{\AA}^2$ ) moxalactam | 16.2                        | 15.2                       | 22.3                        | 29.3                        | 15.2                        | 5.8                         | 28.0                        |
| Occupancy Zn1 (%)                      | 66                          | 48                         | 48                          | 60                          | 49                          | 88                          | 61                          |
| B-factor ( $\text{\AA}^2$ ) Zn1        | 28.5                        | 13.9                       | 5.9                         | 21.5                        | 18.6                        | 4.2                         | 27.9                        |
| Occupancy Zn2 (%)                      | 85                          | 73                         | 86                          | 52                          | 78                          | 100                         | 66                          |
| B-factor ( $\text{\AA}^2$ ) Zn2        | 22.2                        | 19.5                       | 17.8                        | 23.4                        | 21.7                        | 1.3                         | 14.2                        |
| <b>PDB Accession Code</b>              | <b>7UHK</b>                 | <b>7UHL</b>                | <b>7UHM</b>                 | <b>7UHN</b>                 | <b>7UHO</b>                 | <b>7UHP</b>                 | <b>7UHQ</b>                 |

**Supplementary Table 6.** Values of B-factors for specific atoms in moxalactam observed in L1 MBL during the time-resolved reaction. Crystal structures of L1 were determined by pink-beam serial crystallography. Numbers used for the description of atom position in moxalactam were depicted in Figure 3a.

|            | 20 ms | 40 ms | 60 ms | 80 ms | 100 ms | 150 ms | 300 ms | 500 ms | 2000 ms | 4000 ms | hydrolyzed<br>mox. |
|------------|-------|-------|-------|-------|--------|--------|--------|--------|---------|---------|--------------------|
| <b>C2</b>  | 21.66 | 22.67 | 26.41 | 26.25 | 18.13  | 28.17  | 37.54  | 20.05  | 5.91    | 29.16   | 39.38              |
| <b>C3</b>  | 21.28 | 18.43 | 24.73 | 20.68 | 18.67  | 28.00  | 34.88  | 22.01  | 6.38    | 28.81   | 42.00              |
| <b>C4</b>  | 21.41 | 16.75 | 25.71 | 21.96 | 17.96  | 27.36  | 31.70  | 17.35  | 5.64    | 28.37   | 37.91              |
| <b>C6</b>  | 21.72 | 17.76 | 28.32 | 24.12 | 21.14  | 25.94  | 32.06  | 21.38  | 5.18    | 28.76   | 35.14              |
| <b>C7</b>  | 22.33 | 21.19 | 32.63 | 28.36 | 20.36  | 25.14  | 34.63  | 23.63  | 5.41    | 28.55   | 33.24              |
| <b>C8</b>  | 21.63 | 17.92 | 25.65 | 22.79 | 19.20  | 23.38  | 34.53  | 22.74  | 5.23    | 28.69   | 28.49              |
| <b>C13</b> | 21.41 | 14.50 | 25.40 | 21.56 | 18.71  | 28.11  | 31.22  | 20.78  | 4.07    | 28.23   | 36.67              |
| <b>N5</b>  | 21.55 | 15.10 | 29.72 | 23.11 | 19.00  | 26.13  | 31.78  | 17.79  | 4.90    | 28.16   | 35.76              |
| <b>N17</b> | 22.10 | 17.03 | 27.49 | 22.39 | 19.51  | 26.91  | 34.63  | 20.06  | 6.06    | 28.62   | 35.65              |
| <b>O1</b>  | 22.03 | 25.54 | 29.53 | 25.12 | 23.20  | 27.37  | 34.91  | 21.47  | 5.51    | 29.30   | 37.53              |
| <b>O9</b>  | 21.26 | 18.25 | 23.70 | 21.73 | 17.62  | 22.63  | 32.62  | 21.00  | 4.25    | 28.55   | 23.86              |
| <b>O10</b> | -     | -     | -     | -     | -      | 22.72  | 36.83  | 21.55  | 5.24    | 28.91   | 26.67              |
| <b>O11</b> | 22.04 | 17.83 | 27.73 | 27.63 | 22.86  | 24.34  | 30.70  | 19.65  | 5.03    | 28.13   | 32.30              |

### Supplementary References

1. Laskowski, R. A. & Swindells, M. B. LigPlot+: Multiple ligand-protein interaction diagrams for drug discovery. *J. Chem. Inf. Model.* **51**, 2778–2786 (2011).
2. Liebschner, D. *et al.* Polder maps: improving OMIT maps by excluding bulk solvent. *Acta Crystallogr. Sect. D, Struct. Biol.* **73**, 148–157 (2017).
3. White, T. A. *et al.* Crystallographic data processing for free-electron laser sources. *Acta Crystallogr. Sect. D Biol. Crystallogr.* **69**, 1231–1240 (2013).
4. Karplus, P. A. & Diederichs, K. Linking crystallographic model and data quality. *Science* **336**, 1030–1033 (2012).
5. Davis, I. W., Murray, L. W., Richardson, J. S. & Richardson, D. C. MOLPROBITY: structure validation and all-atom contact analysis for nucleic acids and their complexes. *Nucleic Acids Res.* **32**, 615–619 (2004).
