# Supplementary material for: Time-resolved β-lactam cleavage by L1 metallo-β-lactamase
Source: Nat Commun. 2022 Nov 30;13:7379. doi: 10.1038/s41467-022-35029-3 (PMC9712583; doi:10.1038/s41467-022-35029-3)
Supplement: Supplementary file 6 — Source Data File [file 41467_2022_35029_MOESM6_ESM.xlsx]

## Sheet: Figure 1b
Figure 1b - source data
Movement of the ALEX chip along the Y-axis of system for time-resolved SSX data collection. Distance between data collection point increases with longer pump-probe delay.
time (ms)	dark	20	40	60	80	100	150	300	500	2000	4000
Y-axis scan step size (µm)	180	250	250	250	250	250	315	315	380	380	450

## Sheet: Figure 4e
Figure 4e - source data
Changes observed in active site of L1 MBL during cleavage of moxalactam. Following atomic distances were used for illustration presented on Figure 4e.
	40 ms	60 ms	100 ms	150 ms	300 ms	500 ms	2000 ms	4000 ms
Zn2 - N5	0.086	0.019	0.207	0.36	0.462	0.51	0.522	0.543
Zn2 - C8	0.127	0.08	0.148	0.593	0.685	0.57	0.733	0.646
Zn1 - C4	0.068	0.077	0.129	1.037	0.511	0.17	0.023	0.214
Zn2 - C4	0.226	0.292	0.126	0.428	0.16	0.08	0.159	0.141
Zn1 - O9	0.231	0.136	0.238	0.277	0.494	0.63	0.669	0.634
Zn2 - O9	0.018	0.044	0.092	0.603	0.276	0.39	0.386	0.487
